# Supplementary material
Source: Springer Nature journal article supplement (https://www.springermedizin.de/resource/supplementary/12916_2013_888_MOESM22_ESM.pdf/9598866)
Supplement: MOESM22 [file 9598866]

| Child Causes                                                                         | Tariff |        | SSP    |        | RF     |        | PCVA   |        | InterVA |        |
|--------------------------------------------------------------------------------------|--------|--------|--------|--------|--------|--------|--------|--------|---------|--------|
|                                                                                      | No HCE | HCE    | No HCE  | HCE    |
|                                                                                      | Median  | Median |
| <b>GBD Cause Group A: Communicable, maternal, neonatal and nutritional disorders</b> |        |        |        |        |        |        |        |        |         |        |
| AIDS                                                                                 | 97.7   | 96.9   | 99.1   | 98.8   | 98.9   | 98.9   | 99.3   | 99.4   | 95.8    | 95.5   |
| Diarrhea/Dysentery                                                                   | 95.1   | 95.5   | 94.3   | 94.1   | 94     | 94.3   | 91.7   | 96.3   | 98      | 98.1   |
| Encephalitis                                                                         | 96.7   | 97.3   | 97.9   | 97.6   | 98.5   | 98.3   | 97.8   | 99.6   |         |        |
| Hemorrhagic fever                                                                    | 96.1   | 98.6   | 97.1   | 97.1   | 97.9   | 98.1   | 99.1   | 99.4   | 99.9    | 99.9   |
| Malaria                                                                              | 93.1   | 92.8   | 95.8   | 96.3   | 94.5   | 95.3   | 92.9   | 95.1   | 89.9    | 89.2   |
| Measles                                                                              | 96.2   | 98.3   | 97.4   | 98.5   | 99.5   | 100    | 99.2   | 99.9   | 99.8    | 99.9   |
| Meningitis                                                                           | 96.8   | 97.4   | 96.8   | 96.7   | 97.3   | 97.4   | 96.9   | 97.1   | 97.5    | 95.3   |
| Other Infectious Diseases                                                            | 97.5   | 97.6   | 96.4   | 97.4   | 96.1   | 96.5   | 94.8   | 94.8   | 98.9    | 98.5   |
| Pneumonia                                                                            | 98     | 98.2   | 93.8   | 95.9   | 91.7   | 92.5   | 87.4   | 93.4   | 63      | 64.3   |
| Sepsis                                                                               | 95.2   | 95.4   | 98.4   | 98.9   | 96.2   | 96.8   | 98.1   | 98.8   | 100     | 100    |
| <b>GBD Cause Group B: Non-communicable diseases</b>                                  |        |        |        |        |        |        |        |        |         |        |
| Other Cancers                                                                        | 96.6   | 98.5   | 94.2   | 96.5   | 98.6   | 99.2   | 99.7   | 99.9   |         |        |
| Other Cardiovascular Diseases                                                        | 95.7   | 96.3   | 99.1   | 98.4   | 97.3   | 97.7   | 99.7   | 99.9   | 100     | 100    |
| Other Defined Causes of Child Deaths                                                 | 98.5   | 97.1   | 96.8   | 97.2   | 95.4   | 95.2   | 87.2   | 87.3   | 96.9    | 97.4   |
| Other Digestive Diseases                                                             | 97.8   | 98.4   | 96.1   | 97.9   | 97.7   | 97.7   | 99.7   | 99.6   |         |        |
| <b>GBD Cause Group C: Injuries</b>                                                   |        |        |        |        |        |        |        |        |         |        |
| Bite of Venomous Animal                                                              | 99.5   | 99.7   | 99.9   | 100    | 100    | 100    | 100    | 99.9   | 99.6    | 99.8   |
| Drowning                                                                             | 100    | 100    | 99.6   | 99.3   | 100    | 99.7   | 100    | 99.6   | 100     | 99.7   |
| Falls                                                                                | 97     | 97.1   | 98.4   | 98     | 98.7   | 98.8   | 99     | 99.7   | 99.5    | 99.4   |
| Fires                                                                                | 99.4   | 99.4   | 99.2   | 99.4   | 99.5   | 99.7   | 99.8   | 99.8   | 99.8    | 99.6   |
| Poisonings                                                                           | 99.7   | 97.6   | 99.8   | 99.5   | 99.8   | 99.7   | 99.9   | 99.9   | 99.9    | 99.9   |
| Road Traffic                                                                         | 100    | 99.7   | 99.8   | 99.7   | 100    | 100    | 99.7   | 99.9   | 99.1    | 99.2   |
| Violent Death                                                                        | 99.4   | 99.3   | 99.6   | 99.7   | 99.7   | 99.7   | 98.7   | 98     | 98.5    | 98.5   |
